# Supplementary material for: ADRB3 expression in tumor cells is a poor prognostic factor and promotes proliferation in non-small cell lung carcinoma
Source: Springer Nature journal article supplement (doi:10.1007/s00262-020-02627-3), 2020-06-08
Supplement: MOESM1 [file 18061026]

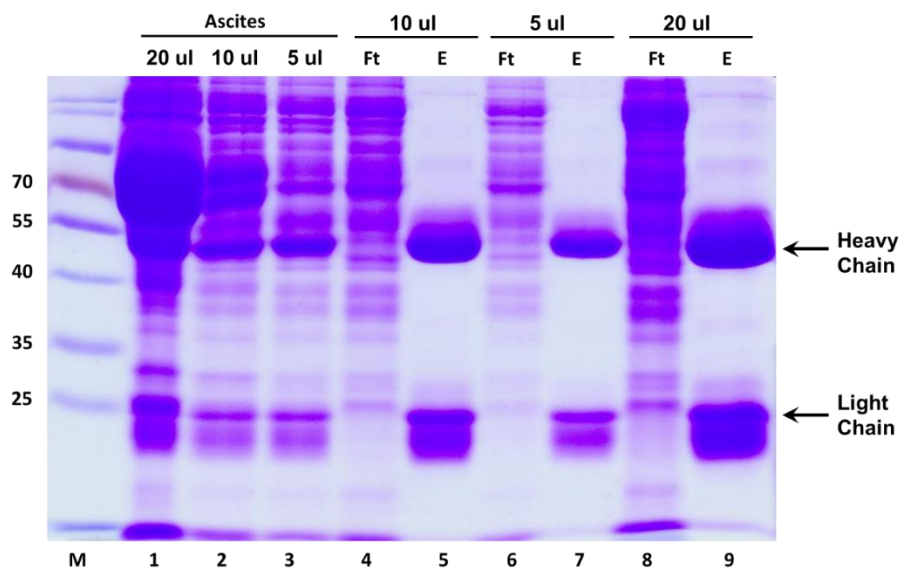

Supplementary Figure 1.

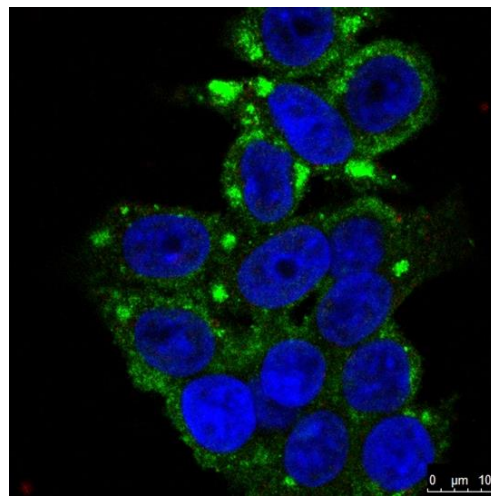

Supplementary Figure 2.
